# Supplementary material for: Measurement report: Enhanced photochemical formation of formic and isocyanic acids in urban region aloft: insights from tower-based online gradient measurements
Source: Copernicus journal article supplement (doi:10.5194/egusphere-2024-13), 2024-01-25
Supplement: Supplementary file 1 [file egusphere-2024-13-supplement.pdf]

1 **Supporting Information for “Measurement report:**  
2 **Enhanced photochemical formation of formic and isocyanic**  
3 **acids in urban region aloft: insights from tower-based online**  
4 **gradient measurements”**

5 Qing Yang<sup>1,2</sup>, Xiao-Bing Li<sup>1,2,\*</sup>, Bin Yuan<sup>1,2,\*</sup>, Xiaoxiao Zhang<sup>1,2</sup>, Yibo Huangfu<sup>1,2</sup>, Lei  
6 Yang<sup>1,2</sup>, Xianjun He<sup>1,2</sup>, Jipeng Qi<sup>1,2</sup>, Min Shao<sup>1,2</sup>

7 <sup>1</sup> Institute for Environmental and Climate Research, Jinan University, Guangzhou  
8 511443, China

9 <sup>2</sup> Guangdong-Hongkong-Macau Joint Laboratory of Collaborative Innovation for  
10 Environmental Quality, Guangzhou 511443, China

11 \* Corresponding authors: Xiao-Bing Li (lixiaobing@jnu.edu.cn), Bin Yuan  
12 (byuan@jnu.edu.cn)

13

14 **Tubing test**

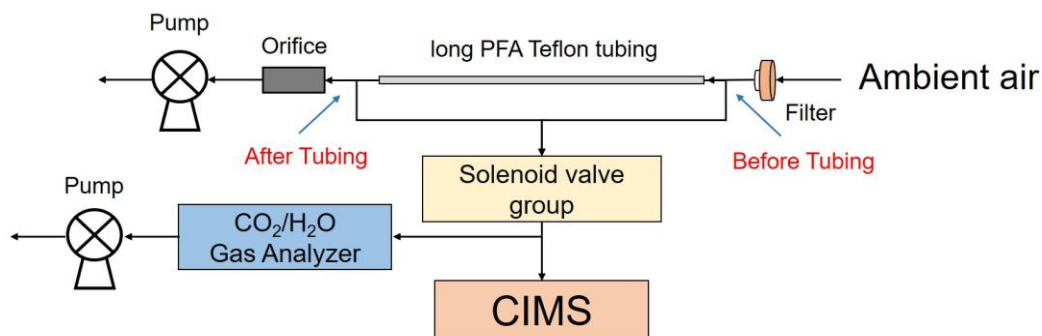

15

16 **Figure S1.** Schematic illustration of the PFA Teflon tubing tests for formic and  
17 isocyanic acids.

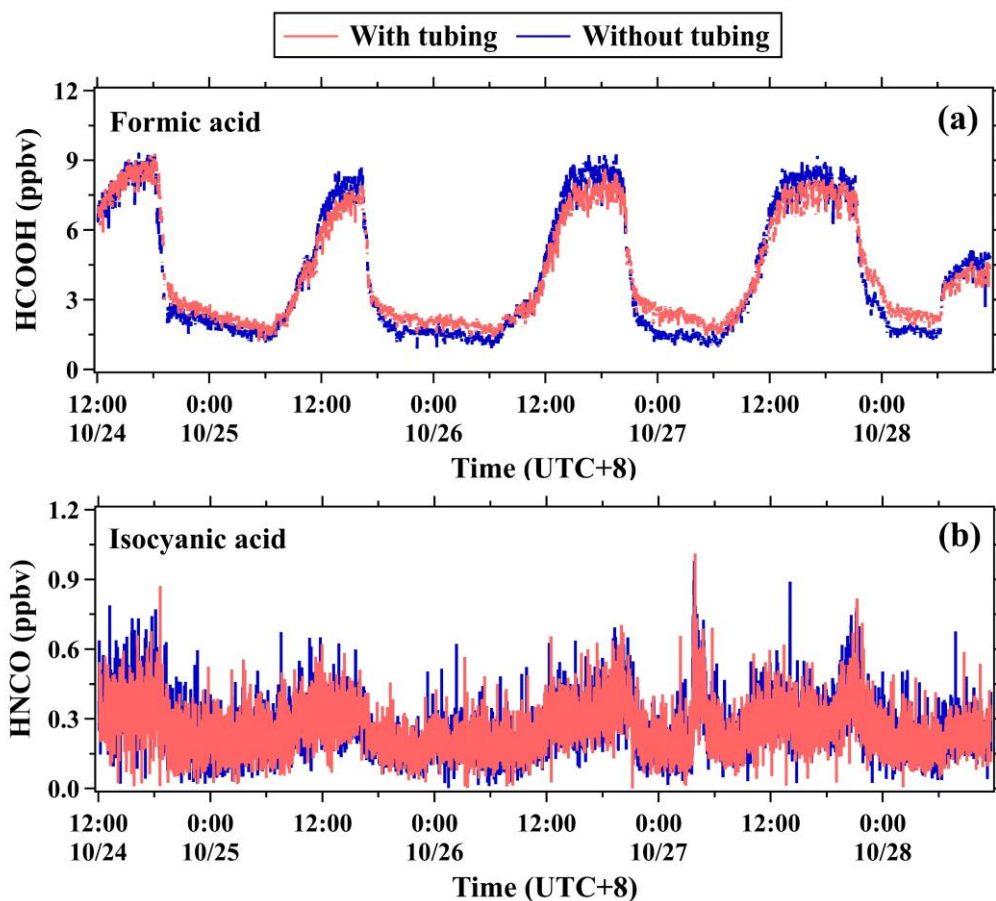

18

19 **Figure S2.** Time series of (a) formic and (b) isocyanic acids concentrations measured  
20 with and without the 400 m long tube.

## 21 Determination of the cumulative influence time $\Delta t$

22 To determine the cumulative influence time  $\Delta t$  of formic and isocyanic acids  
23 when made through the 400 m long tube, 0 to 24 h were substituted into the value of  
24  $\Delta t$  sequentially at intervals of 1 h. Correlation coefficients ( $R^2$ ) between  $\delta[X]_t$  and  
25  $\Delta[X]_t$  for the measurements of formic and isocyanic acids were calculated and shown  
26 in Figure S3. The correlation coefficients between  $\delta[X]_t$  and  $\Delta[X]_t$  for formic acid  
27 showed a unimodal pattern with the increase of  $\Delta t$  and reached the peak at  $\Delta t=14$  h  
28 ( $R^2=0.89$ ). This strong correlation proves that our speculation about the influence of the  
29 memory effect of long tubing on formic acid measurements is correct. In contrast to  
30 formic acid, poor correlations ( $R^2<0.01$ ) between  $\delta[X]_t$  and  $\Delta[X]_t$  were observed for  
31 isocyanic acid. Therefore, the measurements of isocyanic acid made through the 400 m  
32 long tubing were insignificantly affected by interactions between isocyanic acid  
33 molecules and tubing inner walls.

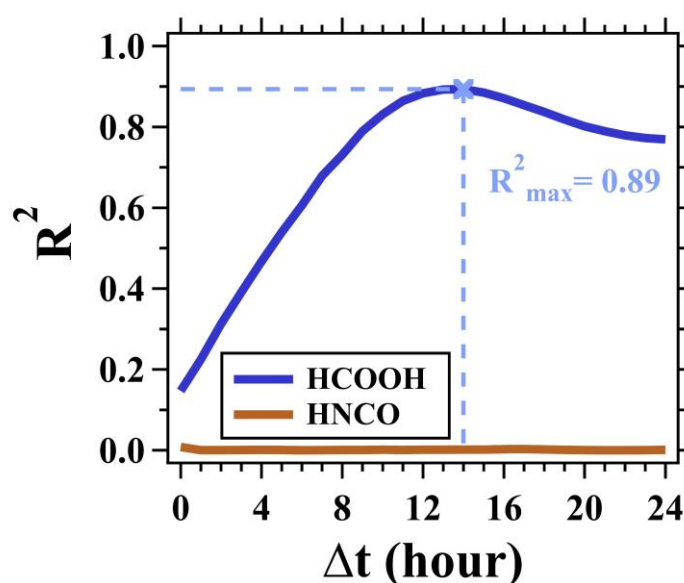

34

35 **Figure S3.** The change in correlation coefficients ( $R^2$ ) between  $\delta[X]_t$  and  $\Delta[X]_t$  for  
36 the measurements of formic and isocyanic acids as a function of  $\Delta t$ .

## 37 **Calculation of column-integrated concentrations (CICs)**

38 Column-integrated concentrations (CICs) were calculated to characterize the  
39 abundance and diurnal variability of formic and isocyanic acids in the whole boundary  
40 layer. Due to the diurnal changes in heights of the planetary boundary layer, the high  
41 concentrations of formic and isocyanic acids in the nocturnal residual layer have  
42 important contributions to their budgets in the boundary layer. Therefore, CIC is  
43 defined as the total number of molecules from the surface to the top of the atmospheric  
44 boundary layer ( $L_{max}$ ) over a unit area ( $\text{cm}^2$ ). Eq. (S1) provides the theoretical  
45 calculation formula of CIC:

$$46 \quad \text{CIC}(i)_t = \int_0^{L_{max}} [i]_h dh \times \frac{N_A}{V_{molar}(h)} \quad (\text{S1})$$

47 where  $\text{CIC}(i)_t$  represents the CIC (*unit: molecule  $\text{cm}^{-2}$* ) of the species  $i$  (namely formic  
48 and isocyanic acids) at time  $t$ .  $[i]_h$  represents the mixing ratio of species  $i$  (*unit:  $10^{-9}$  mol*  
49  *$\text{mol}^{-1}$* ) at an altitude  $h$  (*unit: cm*).  $L_{max}$  is the maximum height of the planetary  
50 boundary layer (PBLH) at time  $t$ . On any given day,  $L_{max}$  is defined as the maximum  
51 PBLH the day before if the PBLH has not reached its maximum on that day. Otherwise,  
52  $L_{max}$  is defined as the maximum PBLH on that day, as shown in Figure S4.  $N_A$  is the  
53 Avogadro constant ( $6.02 \times 10^{23}$  *molecule  $\text{mol}^{-1}$* ).  $V_{molar}(h)$  is the molar volume of gas at  
54 the height of  $h$  and can be calculated based on the measurements of atmospheric  
55 temperature (*unit: K*) and pressure (*unit: hPa*) using the ideal gas law.

56 Due to the limited height of the tower, the concentrations of formic and isocyanic  
57 acids between the maximum measurement height (320 m) and the top of the boundary  
58 layer were assumed to be equal to those measured at 320 m. It should be noted that this  
59 assumption may underestimate the CICs of formic and isocyanic acids due to their  
60 positive vertical gradients. The diurnal variation patterns of CICs for formic and  
61 isocyanic acids were not significantly changed by this assumption due to their larger  
62 vertical gradients in daytime than in nighttime. The linear interpolation method was  
63 used to estimate concentrations of formic and isocyanic acids between two  
64 measurement heights.

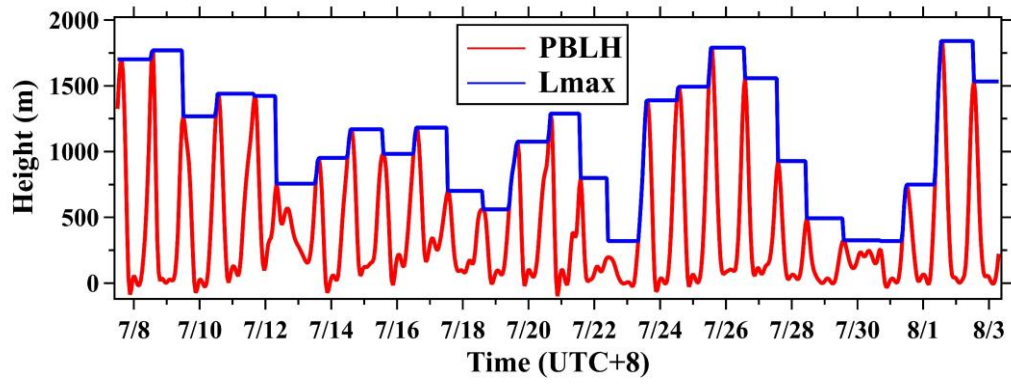

65

66 **Figure. S4** Time series of the PBLH and L<sub>max</sub> during the field campaign.
